# Supplementary material for: Effect of the glucagon-like peptide-1 analogue liraglutide on coronary microvascular function in patients with type 2 diabetes – a randomized, single-blinded, cross-over pilot study
Source: Springer Nature journal article supplement (doi:10.1186/s12933-015-0206-3), 2015-04-21
Supplement: MOESM1 [file 9760142]

**Additional file 1: Carry over, period and sequence effect for primary and secondary outcomes after performing analysis of variance (ANOVA) for a cross-over study.**

| Variable                 | Carry over effect (p-value) | Period effect (p-value) | Sequence effect (p-value) |
|--------------------------|-----------------------------|-------------------------|---------------------------|
| CFR                      | 0.85                        | 0.51                    | 0.83                      |
| RHI                      | 0.73                        | 0.09                    | 0.74                      |
| AI                       | 0.29                        | 0.85                    | 0.26                      |
| HbA1c (mmol/mol)         | 0.05                        | 0.44                    | 0.07                      |
| Weight (Kg)              | 0.20                        | 0.74                    | 0.29                      |
| Waist Circumference (cm) | 0.12                        | 0.49                    | 0.18                      |
| Systolic BP (mmHg)       | 0.81                        | 0.51                    | 0.78                      |
| Diastolic BP (mmHg)      | 0.38                        | 0.95                    | 0.24                      |
| Heart rate (bpm)         | 0.68                        | 0.27                    | 0.54                      |
| Fasting glucose (mmol/L) | 0.75                        | 0.06                    | 0.69                      |
| Insulin ( $\mu$ U/ml)    | 0.54                        | 0.41                    | 0.48                      |
| C-peptide (pmol/L)       | 0.71                        | 0.95                    | 0.60                      |
| HOMA index               | 0.57                        | 0.77                    | 0.43                      |

Data are presented as p-values for carry over, period and sequence effect. ANOVA-analysis for cross-over design experiments were used (pkcross command in STATA 13.1).

Abbreviations: *CFR* coronary flow reserve, *RHI* reactive hyperaemia index, *AI* augmentation index, *HbA1c* glycated haemoglobin, *BP* blood pressure, *HOMA* Homeostatic Model Assessment.
